# Supplementary material for: Plant and gastropod diversity across fragmented urban landscapes: patterns and environmental drivers
Source: Research Square preprint supplement (doi:10.21203/rs.3.rs-3416407/v1), 2023-10-11
Supplement: Supplementary file 1 [file 422df472d557d02ddf813765.docx]

**Table 7** Comparison of the plant species group composition of the three analysed forest categories: forest controls (CON), forest peninsulas (PEN) and forest islands (ISL). Differential species are shown in bold.

Explanations: [6] herb layer; [0] all layers merged (trees, shrubs, herbs).

Number of relevés: 30

Number of species: 166

**Habitat ISL PEN CON**

**Relevé number** 122223| 1112222| 11111122

3789067890|1253670235|4612458914

**Number of species** 3334432252|4234242343|2221243222

5513191855|1392749319|8773810077

**Alien neophytes**

*Impatiens parviflora* [6] 3223..3422|3+r242453+|+2++122333

*Robinia pseudoacacia* [0] **+2.+.2.2+.|2.+..+..12**|.........2

*Mahonia aquifolium* [6] **..++.++...|........r.**|..........

*Juglans nigra* [6] **.+........|++**........|..........

*Aesculus hippocastanum* [0] **..r...1...|........r.**|..........

*Syringa vulgaris* [0] **...2.+....**|..........|..........

*Tulipa gesneriana* L. [6] **.....+....|........r.**|..........

*Pinus nigra* [1] **..2.......|..........**|..........

*Laburnum anagyroides* [4] **..+.......|..........**|..........

*Prunus serotina* [6] **....r.....|..........**|..........

*Iris germanica* agg.[6] **....r.....|..........**|..........

*Ailanthus altissima* [0] **.....3....|..........**|..........

*Philadelphus coronarius* [0] **.....2....|..........**|..........

*Lilium* sp.[6] **.....+....|..........**|..........

*Lonicera maackii* (Rupr.) Maxim.[0] **........2.|..........**|..........

*Geranium pyrenaicum* [6] **........+.|..........**|..........

*Ribes rubrum* [6] **..........|+.........**|..........

*Lunaria annua* [6] **..........|.....+....**|..........

*Erigeron acris* [6] **..........|.......r..**|..........

*Phytolacca americana* [6] **..........|..........**|**.+.**.......

**Alien archaeophytes**

*Alliaria petiolata* [6] .++++2.+1.|+r++2+++++|+.+r1++.++

*Fallopia convolvulus* [6] ...+.+..+.|..+++..+.+|....++.+++

*Chelidonium majus* [6] **+.4+.+.1.+|2.+..++.1r**|..........

*Lamium purpureum* [6] **..+.r+.+1.|..++1..+1+**|.....+....

*Anthriscus cerefolium* ssp. *trichosperma* [6] **..+..2.+1.|..+++.++1.**|....1.....

*Juglans regia* [0] **..2.+...r.|......+.+.**|..........

*Prunus domestica* ssp. *insititia* [0] .....2....|........+.|..........

*Lactuca serriola* [6] .....+....|.r........|..........

*Castanea sativa* [0] .........r|.........1|..........

*Ballota nigra* [6] .....2....|..........|..........

*Vicia villosa* [6] .....+....|..........|..........

*Carduus acanthoides* [6] .....r....|..........|..........

*Vicia angustifolia* [6] ..........|.......r..|..........

**Native ruderal species**

*Stellaria media* [6] ..2..+..1.|**+.+++...1+**|.....+..+.

*Lamium maculatum* [6] ..+.......|.....**rr1+**.|.....+....

*Taraxacum* sect. *Ruderalia* [6] ....++....|..........|..........

*Daucus carota* [6] ........+.|..........|..........

*Artemisia vulgaris* [6] ........+.|..........|..........

*Vicia cracca* [6] ..........|...+......|..........

*Chenopodium album* [6] ..........|.........r|..........

**Native apophytes**

*Galium aparine* [6] .+3++3.11+|+.++++++1+|+++++++.+.

*Sambucus nigra* [0] 224+.+22.2|22.+2+++2.|+++..+++++

*Veronica sublobata* [6] **1.+.++2.2+|..1.323322**|.....2....

*Mycelis muralis* [6] ...+......|**1.+...+.+.|+++..++.++**

*Geum urbanum* [6] **1..+.+..1.|+.++++**....|.....++...

*Geranium robertianum* [6] +.......+.|**1+.+..+.2.|+....+...+**

*Chaerophyllum temulum* [6] **..........|+..+1+.++.|.+...1....**

*Urtica dioica* [6] +.........|.......+..|.+...+....

*Heracleum sphondylium* [6] r.........|..r.......|..........

*Lapsana communis* [6] ..........|+.......+.|..........

*Impatiens noli-tangere* [6] +.........|..........|..........

*Aegopodium podagraria* [6] +.........|..........|..........

*Clematis vitalba* [0] .....2....|..........|..........

*Humulus lupulus* [6] .....+....|..........|..........

*Rumex obtusifolius* [6] ..........|+.........|..........

*Calamagrostis epigejos* [6] ..........|..........|....+.....

**Carpinion and *Carpino-Fagetea* species**

*Quercus petraea* agg.[0] .4244.3444|4435444444|4424442444

*Carpinus betulus* [0] 23.2+..1.2|2342+2.323|+353+24233

*Melica uniflora* [6] 4..3+...2+|**+.15221222|3442443433**

*Prunus avium* [0] .1+2+..24.|2+22+22+22|+2+r.2+.22

*Acer platanoides* [0] +r.++453.4|2..r.24+2.|+r..r+r1++

*Tilia cordata* [0] .2.3+.22.2|2221..2123|+3..333223

*Symphytum tuberosum* agg.[6] 1+......+.|...**++.+++.|..1.11..++**

*Poa nemoralis* [6] +..+2...+.|+.+1.+....|+1..2..+..

*Galium odoratum* [6] +1........|.....+....|**++31.1+..1**

*Carex pilosa* [6] 1.........|.....2.+..|**.2+5.21+..**

*Acer pseudoplatanus* [0] .+.+......|..........|**+++...rr+.**

*Fagus sylvatica* [0] .......r..|.+.......+|**22r+..2...**

*Viola reichenbachiana* [6] +..+......|+......+..|..++......

*Galeobdolon montanum* [6] .1........|..++......|.....+...+

*Stellaria holostea* [6] 1.........|........+.|..1.....+.

*Pulmonaria officinalis* [6] .+........|..........|..+..+....

*Polygonatum latifolium* [6] ..1...1...|..........|..........

*Vinca minor* [6] ..........|...+......|....1.....

*Galium schultesii* [6] ..........|..+.......|..........

*Melittis melissophyllum* [6] ..........|.......r..|..........

*Tithymalus amygdaloides* [6] ..........|..........|....+.....

*Mercurialis perennis* [6] ..........|..........|.........1

*Lathyrus vernus* [6] ..........|..........|.........+

**Other forest species**

*Acer campestre* [0] **223++4+221|222232222**+|+...++..+2

*Ficaria bulbifera* [6] 4111.12213|+.1331+11.|..+..2+.++

*Polygonatum multiflorum* [6] 1+.+3.+...|.12...11+1|+++++1+++1

*Euonymus europaeus* [0] **+2++.+22++|++2++2r++2**|....+2....

*Convallaria majalis* [6] .+..2.+...|**2+1..31122|411+.+2322**

*Corydalis cava* [6] 12+2.22.+3|.4..+11..+|.+...3++.3

*Loranthus europaeus* [1] .+.++...++|...+++++++|+...++...+

*Rubus hirtus* s.lat.[6] ...+....+.|+.+..+.1+1|12...+2+++

*Fraxinus excelsior* [0] **4++r..22r2**|..+..2....|......+...

*Arum cylindraceum* Gasp.[6] **+.....++++|.++.+..r..**|.....+....

*Taxus baccata* [0] **..++.+2+r2|r..r.+....**|..........

*Luzula luzuloides* [6] ...23....+|+.+..+...1|....+.+...

*Galeopsis pubescens* [6] ..........|**+.......++|.++..+2++.**

*Sorbus torminalis* [0] ...2+.....|...1.22..2|.......2..

*Hieracium murorum* [6] ...1+.....|..1+.+...+|....+.....

*Dryopteris filix-mas* [6] +......+..|..........|.++.....+.

*Lilium martagon* [6] +........+|+.....+...|........+.

*Campanula persicifolia* [6] ...+1.....|+.+..r....|..........

*Calamagrostis arundinacea* [6] ....1.....|.....+...+|+......+..

*Tilia platyphyllos* [0] .......2+.|.....2....|.....1+...

*Pyrus communis* [0] ..2+......|.........r|+.........

*Carex digitata* [6] ....+...+.|..+.......|.+........

*Viola hirta* [6] .....+.++.|.......+..|..........

*Ulmus glabra* [0] 2.2.......|....+.....|..........

*Corydalis intermedia* [6] **......+2.2**|..........|..........

*Brachypodium sylvaticum* [6] ........+.|..........|+.1.......

*Moehringia trinervia* [6] +.........|.+........|..........

*Lonicera xylosteum* [0] .2........|.+........|..........

*Allium ursinum* [6] .+........|.....+....|..........

*Galanthus nivalis* [6] .+........|........+.|..........

*Tanacetum corymbosum* [6] ....1.....|......r...|..........

*Anemone nemorosa* [6] .2........|..........|..........

*Sorbus aria* [6] ....+.....|..........|..........

*Ulmus laevis* [4] .....+....|..........|..........

*Scilla vindobonensis* [6] .....+....|..........|..........

*Ulmus minor* [0] .......2..|..........|..........

*Viburnum opulus* [6] ........+.|..........|..........

*Cornus sanguinea* [6] ..........|..+.......|..........

*Carex muricata* [6] ..........|..+.......|..........

*Senecio ovatus* [6] ..........|..........|+.........

*Maianthemum bifolium* [6] ..........|..........|..1.......

*Oxalis acetosella* [6] ..........|..........|..+.......

*Quercus cerris* [6] ..........|..........|..r.......

*Quercus* sp.[7] ..........|..........|....+.....

*Dryopteris carthusiana* [6] ..........|..........|........+.

**Others**

*Hedera helix* [0] 1232243212|+222+32.2+|2+..211+12

*Crataegus monogyna* [0] **.+22.2.+22|+2..22...+**|....+2....

*Ligustrum vulgare* [0] **.22..2..2.|.++1+2..++**|..........

*Rosa canina* agg.[0] **.+22....2.|+..r.2r.r.**|..r.......

*Dactylis glomerata* [6] +.+.+.....|+..++.....|+...+1....

*Prunus spinosa* [0] .+.1....2.|++.2.+....|+...+.....

*Corylus avellana* [0] **22....+2r1**|.........2|.....+....

*Ajuga reptans* [6] ....+...1.|+....+....|.....1+.+.

*Hieracium sabaudum* [6] ...++.....|...+.+....|....+.+...

*Vincetoxicum hirundinaria* [6] ...+1...1.|...+......|.......r..

*Allium schoenoprasum* [6] ........1.|+........+|.........+

*Euonymus verrucosus* [0] .+.+......|.........+|..........

*Solidago virgaurea* ssp. *virgaurea* [6] ...+1.....|...+......|..........

*Festuca* sp.[6] ....+...+.|.....+....|..........

*Vicia* sp.[6] .....r..+.|...+......|..........

*Allium vineale* [6] ........+.|.......r.+|..........

*Agrostis capillaris* [6] ...+......|...+......|..........

*Melampyrum pratense* [6] ....2.....|.........+|..........

*Hylotelephium maximum* [6] ....+.....|.....r....|..........

*Avenella flexuosa* [6] ....+.....|..........|....1.....

*Hypericum perforatum* [6] .....+..r.|..........|..........

*Hieracium* sp.[6] ..........|+........+|..........

*Pinus sylvestris* [1] ..........|........1.|......2...

*Lysimachia vulgaris* [6] +.........|..........|..........

*Anthericum ramosum* [6] ....+.....|..........|..........

*Genista tinctoria* [6] ....+.....|..........|..........

*Galium album* s.lat.[6] ....+.....|..........|..........

*Digitalis grandiflora* [6] ....+.....|..........|..........

*Muscari comosum* [6] ........1.|..........|..........

*Carex divulsa* [6] ........1.|..........|..........

*Veronica chamaedrys* [6] ........+.|..........|..........

*Tithymalus cyparissias* [6] ........+.|..........|..........

*Poa bulbosa* [6] ........+.|..........|..........

*Acinos arvensis* [6] ........r.|..........|..........

*Cornus mas* [6] ........r.|..........|..........

*Berberis vulgaris* [4] ..........|..+.......|..........

*Persicaria dubia* [6] ..........|..+.......|..........

*Allium scorodoprasum* [6] ..........|...+......|..........

*Poa pratensis* [6] ..........|...+......|..........

*Agrimonia eupatoria* [6] ..........|...r......|..........

*Rumex acetosa* [6] ..........|..........|.r........

*Viscum album* [1] ..........|..........|......+...
